# Supplementary material for: Mariana serpentinite mud volcanism exhumes subducted seamount materials: implications for the origin of life
Source: Philos Trans A Math Phys Eng Sci. 2020 Jan 6;378(2165):20180425. doi: 10.1098/rsta.2018.0425 (PMC7015305; doi:10.1098/rsta.2018.0425)
Supplement: Table S1 [file rsta20180425supp2.xlsx]

## Sheet: Sheet1
Supplementary Materials: Table 1. Electron microprobe analysis of titanium-augite (cpx) in IODP Expedition 366 metabasite.
IODP-SAMPLE	U1494A-8F-CC, 21/22 (ts61)-cpx1-c	U1494A-8F-CC, 21/22 (ts61)-cpx1-r	U1494A-8F-CC, 21/22 (ts61)-cpx2-c	U1494A-8F-CC, 21/22 (ts61)-cpx2-r	U1494A-8F-CC, 21/22 (ts61)-cpx3-c	U1494A-8F-CC, 21/22 (ts61)-cpx3b-profile	U1494A-8F-CC, 21/22 (ts61)-cpx3b-profile	U1494A-8F-CC, 21/22 (ts61)-cpx3b-profile	U1494A-8F-CC, 21/22 (ts61)-cpx3b-profile	U1494A-8F-CC, 21/22 (ts61)-cpx3b-profile	U1494A-8F-CC, 21/22 (ts61)-cpx3b-profile	U1494A-8F-CC, 21/22 (ts61)-cpx3b-profile	U1494A-8F-CC, 21/22 (ts61)-cpx3b-profile	U1494A-8F-CC, 21/22 (ts61)-cpx3b-profile	U1494A-8F-CC, 21/22 (ts61)-cpx3b-profile	U1494A-8F-CC, 21/22 (ts61)-cpx3b-profile	U1494A-8F-CC, 21/22 (ts61)-cpx3b-profile	U1494A-8F-CC, 21/22 (ts61)-cpx3b-profile	U1494A-8F-CC, 21/22 (ts61)-cpx3b-profile	U1494A-8F-CC, 21/22 (ts61)-cpx3b-profile	U1494A-8F-CC, 21/22 (ts61)-cpx3b-profile	U1494A-8F-CC, 21/22 (ts61)-cpx3b-profile	U1494A-8F-CC, 21/22 (ts61)-cpx3b-profile	U1494A-8F-CC, 21/22 (ts61)-cpx3b-profile	U1494A-8F-CC, 21/22 (ts61)-cpx4-profile	U1494A-8F-CC, 21/22 (ts61)-cpx4-profile	U1494A-8F-CC, 21/22 (ts61)-cpx4-profile	U1494A-8F-CC, 21/22 (ts61)-cpx4-profile	U1494A-8F-CC, 21/22 (ts61)-cpx4-profile	U1494A-8F-CC, 21/22 (ts61)-cpx4-profile	U1494A-8F-CC, 21/22 (ts61)-cpx4-profile	U1494A-8F-CC, 21/22 (ts61)-cpx4-profile	U1494A-8F-CC, 21/22 (ts61)-cpx4-profile	U1494A-8F-CC, 21/22 (ts61)-cpx4-profile	U1494A-8F-CC, 21/22 (ts61)-cpx4-profile	U1494A-8F-CC, 21/22 (ts61)-cpx4-profile	U1494A-8F-CC, 21/22 (ts61)-cpx4-profile	U1494A-8F-CC, 21/22 (ts61)-cpx4-profile	U1494A-8F-CC, 21/22 (ts61)-cpx4-profile	U1494A-8F-CC, 21/22 (ts61)-cpx4-profile	U1494A-8F-CC, 21/22 (ts61)-cpx4-profile	U1494A-8F-CC, 21/22 (ts61)-cpx4-profile	U1494A-8F-CC, 21/22 (ts61)-cpx4-profile	U1494A-8F-CC, 21/22 (ts61)-cpx4-profile	U1494A-8F-CC, 21/22 (ts61)-cpx5-profile	U1494A-8F-CC, 21/22 (ts61)-cpx5-profile	U1494A-8F-CC, 21/22 (ts61)-cpx5-profile	U1494A-8F-CC, 21/22 (ts61)-cpx5-profile	U1494A-8F-CC, 21/22 (ts61)-cpx5-profile
profile step spacing (µm)						7.8	7.8	7.8	7.8	7.8	7.8	7.8	7.8	7.8	7.8	7.8	7.8	7.8	7.8	7.8	7.8	7.8	7.8	7.8	8.9	8.9	8.9	8.9	8.9	8.9	8.9	8.9	8.9	8.9	8.9	8.9	8.9	8.9	8.9	8.9	8.9	8.9	8.9	8.9	8	8	8	8	8
SiO2	49.3185	49.1078	48.8714	48.7524	48.4481	49.8115	49.5403	49.3605	48.7625	48.5012	48.2574	48.2442	48.7721	48.5828	48.5461	48.8926	48.9285	49.3716	48.6485	48.4777	48.689	48.7904	48.4596	48.7857	48.5841	48.787	48.9451	49.2747	49.2279	49.2629	48.9397	48.5774	48.1342	48.8094	48.6079	48.9788	48.9943	49.2105	49.7979	49.579	49.1329	48.3957	48.504	49.1206	50.7032	50.133	49.567	49.4709	49.332
TiO2	1.35713	1.60039	1.21056	1.11617	1.40088	1.00274	1.08143	1.07979	1.37759	1.51563	1.55352	1.52349	1.17692	1.36089	1.32887	1.26413	1.29502	1.09282	1.42498	1.55559	1.61945	1.5928	1.78194	1.55958	1.56873	1.36156	1.15494	1.20528	1.08984	1.06929	1.22395	1.33854	1.46641	1.45536	1.22389	1.12307	1.12334	1.17304	1.00883	1.05109	1.24725	1.43007	1.54226	1.51676	1.04722	1.17061	1.20604	1.33471	1.50466
Al2O3	4.66906	2.95564	5.04145	5.28588	5.11756	3.08604	3.84644	4.30367	4.74594	4.73756	5.13209	5.08337	4.76532	4.86202	4.71921	4.39405	4.18832	3.26454	3.29719	3.23192	2.80419	2.50225	2.36722	1.9978	2.51119	2.8383	3.00553	2.99907	3.21284	3.81795	4.48386	4.76727	5.05394	4.65595	4.6288	4.18987	4.1172	3.67894	3.14522	2.78181	2.87317	2.92548	2.59745	2.41674	3.14648	3.79406	4.21609	4.54229	4.84279
FeO	8.71336	15.4807	7.55278	8.10714	8.14475	10.1632	8.48636	8.0672	8.43901	8.39685	8.49039	8.59971	8.28687	8.37076	8.4051	8.51263	9.3752	10.5259	12.5066	13.6782	14.015	15.0645	15.7057	16.317	14.8926	13.4917	12.1941	11.0883	10.4785	9.52604	8.69904	8.48097	8.72868	11.0526	9.14625	8.80116	8.68491	9.15647	9.82087	11.4989	12.8747	14.185	14.7647	15.6339	10.6499	10.4671	9.72723	9.4539	9.18083
MnO	0.239518	0.497189	0.143527	0.200267	0.168229	0.244674	0.235558	0.245355	0.198683	0.16496	0.150544	0.203482	0.185974	0.214758	0.18905	0.179477	0.203341	0.284593	0.387433	0.343882	0.370716	0.333832	0.466871	0.447494	0.372355	0.28214	0.306611	0.254223	0.270427	0.269135	0.230867	0.234139	0.171499	0.198101	0.232363	0.226084	0.277425	0.168328	0.224232	0.255638	0.357255	0.364472	0.431003	0.498975	0.269842	0.231605	0.222103	0.18064	0.220633
MgO	14.2697	11.5819	14.5996	14.7087	14.0442	14.4825	14.3455	14.2757	14.0525	14.1125	13.7354	13.7866	14.0438	13.8825	14.0499	14.0888	14.0771	13.9389	13.2276	12.7531	12.3003	12.3002	11.7166	11.0757	12.5726	13.2609	13.7037	14.079	14.2516	14.3858	14.2308	13.8196	13.7698	11.7748	13.1759	13.8725	14.1931	14.1034	14.3453	14.0509	13.5157	12.9961	12.452	11.9049	14.7197	14.2359	13.9773	13.8505	13.5599
CaO	20.7176	18.501	21.0904	20.5502	21.1058	19.5196	20.9438	21.2071	20.8498	20.4654	20.8199	20.797	21.0852	20.9837	21.029	20.9567	20.3378	19.6714	18.9123	18.5479	18.5113	18.0838	17.9486	18.2201	17.8369	18.1671	18.5624	19.1982	19.5566	20.2988	20.6063	20.8981	20.8361	17.59	20.4289	20.911	21.0755	20.6288	20.2882	19.2589	18.1961	17.7725	17.6204	17.8916	19.4832	19.7316	20.0023	20.1691	20.3667
Na2O	0.290626	0.3086	0.278213	0.285185	0.275086	0.307228	0.287386	0.29091	0.297802	0.321322	0.314161	0.323679	0.284235	0.297458	0.265591	0.288099	0.291322	0.420154	0.321438	0.367919	0.316017	0.342584	0.333899	0.318326	0.351202	0.41277	0.315867	0.308766	0.321411	0.296679	0.277011	0.291067	0.29811	1.85374	0.96623	0.436068	0.324844	0.290783	0.297735	0.324994	0.333616	0.300879	0.313008	0.363981	0.327705	0.321508	0.30495	0.314232	0.343303
K2O	0.006898	0.004298	0.0098115	0	0.0026445	0.010721	0.001189	0	0.001945	0	0	0.010155	0.000216	0	0	0	0.00146	0.007682	0	0	0.008687	0	0.008465	0.010716	0.003514	0.005413	0	0.00195	0.002979	0	0	0.002757	0	0.002064	0	0.013355	0	0	0	0	0.007421	0	0	0.00837	0.002165	0	0	0	0
Cr2O3	0.211085	0.015406	0.290614	0.150403	0.265216	0.058412	0.129403	0.162451	0.215316	0.496545	0.307844	0.25762	0.186659	0.221058	0.239619	0.163315	0.237253	0.055558	0.013932	0.024979	0	0.005526	0.015436	0	0.008298	0	0.014516	0.088554	0.078634	0.154431	0.206822	0.25621	0.377442	0.182425	0.170406	0.100582	0.083099	0.152419	0.106435	0.063235	0.023383	0	0.007741	0	0.098062	0.149749	0.246689	0.212087	0.333893
TOTAL	99.7934	100.053	99.0885	99.1565	98.9725	98.6866	98.8972	98.9927	98.9411	98.712	98.7612	98.8292	98.7873	98.7759	98.7725	98.7398	98.9354	98.6331	98.7398	98.9813	98.6347	99.0158	98.8044	98.7323	98.7015	98.6068	98.2028	98.498	98.4907	99.081	98.8984	98.666	98.8362	97.5745	98.5806	98.6524	98.8737	98.5626	99.0347	98.8644	98.5616	98.3702	98.2325	99.3558	100.447	100.235	99.4698	99.5283	99.6847
Analyst: Kevin Johnson
Compositional analyses were acquired on an electron microprobe (JEOL JXA-8500F) equipped with 5 tunable wavelength dispersive spectrometers.
Operating conditions were 40 degrees takeoff angle, and a beam energy of 15 keV. The beam current was 15 nA, and the beam diameter was 2 microns.
Elements were acquired using analyzing crystals LiFH for Ti ka, Cr ka, LiF for Fe ka, Mn ka, LiFH for Ti ka, Cr ka, PETH for K ka, Ca ka, and TAP for Si ka, Na ka, Al ka, Mg ka.
The standards were Garnet, Verma (Mn) for Mn ka, Sphene glass for Ti ka, Chromite USNM 117075 for Fe ka, Mg ka, Cr ka, Diopside-2 (UCLA) for Ca ka, Si ka, Albite, Amelia for Na ka, Al ka, and Orthoclase (OR-1) for K ka.
The counting time was 30 seconds for all elements. The off peak counting time was 30 seconds for all elements. The off peak correction method was Linear for all elements.
Unknown and standard intensities were corrected for deadtime. Standard intensities were corrected for standard drift over time.
Results, other than profiles, are the average of 3 points and detection limits ranged from .008 weight percent for Al ka to .009 weight percent for Mg ka to .013 weight percent for Si ka to .022 weight percent for Ti ka to .034 weight percent for Mn ka. Profiles are equally spaced single point analyses across a grain from rim to rim.
Analytical sensitivity (at the 99% confidence level) ranged from .184 percent relative for Si ka to .266 percent relative for Ca ka to 2.895 percent relative for Cr ka to 29.805 percent relative for Mn ka to 149.516 percent relative for Ti ka.
Oxygen was calculated by cation stoichiometry and included in the matrix correction.
The matrix correction method was ZAF or Phi-Rho-Z Calculations and the mass absorption coefficients dataset was LINEMU Henke (LBL, 1985) < 10KeV / CITZMU > 10KeV.
The ZAF or Phi-Rho-Z algorithm utilized was Armstrong/Love Scott (default).
[See J. T. Armstrong, Quantitative analysis of silicates and oxide minerals: Comparison of Monte-Carlo, ZAF and Phi-Rho-Z procedures, Microbeam Analysis--1988, p 239-246]
[truncated: 92 more columns]
